# Supplementary material for: Anti-TNF drives regulatory T cell expansion by paradoxically promoting membrane TNF–TNF-RII binding in rheumatoid arthritis
Source: PubMed Central journal article supplement — J Exp Med. 2016 Jun 27;213(7):1241–53. doi: 10.1084/jem.20151255 (PMC4925013; doi:10.1084/jem.20151255), 2016-06-27
Supplement: supp_jem.20151255_JEM_20151255_sm.pdf [file supp_jem.20151255_JEM_20151255_sm.pdf]

SUPPLEMENTAL MATERIAL

Nguyen and Ehrenstein, <http://www.jem.org/cgi/content/full/jem.20151255/DC1>

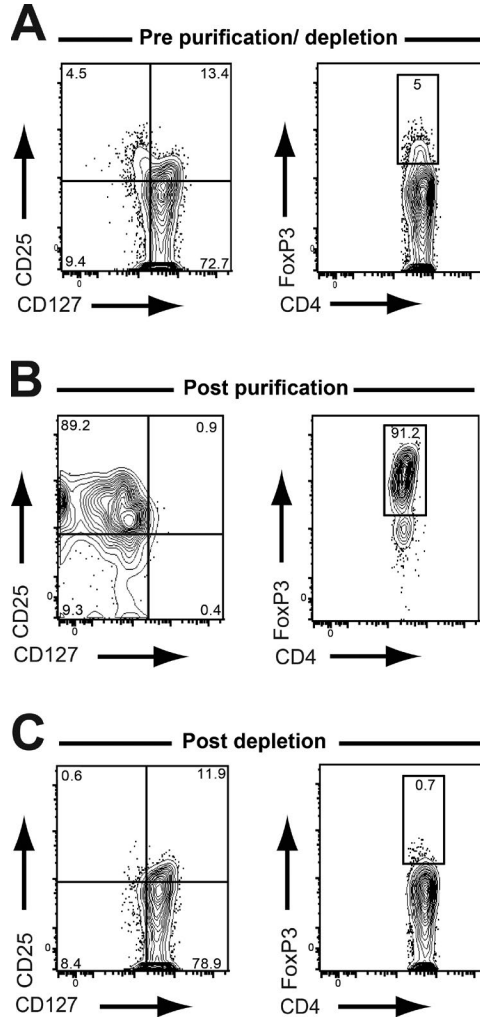

Figure S1. **Gating strategy for T reg cell purification and T reg cell depletion.** (A) PBMCs were prepared for purification using flow cytometry after labeling with CD4, CD25, and CD127. Foxp3 staining was performed on a small aliquot before sorting. (B) The frequency of CD4<sup>+</sup>CD25<sup>+</sup>CD127<sup>-</sup> and CD4<sup>+</sup>FoxP3<sup>+</sup> is shown after purification of T reg cells. (C) PBMCs were depleted of T reg cells, and the efficiency of depletion is shown based on staining with CD4, CD25, and CD127 (left) and CD4 and FoxP3 (right). Data are representative of at least four experimental repeats.
